# Supplementary material for: Prevalence estimates of genital Chlamydia trachomatis infection in Belgium: results from two cross-sectional studies
Source: PubMed Central journal article supplement (PMC8439092; doi:10.1186/s12879-021-06646-y), 2021-09-14
Supplement: 12879_2021_6646_MOESM2_ESM.pdf [file 12879_2021_6646_MOESM2_ESM.pdf]

## Health Interview Survey, 2018

### Respondent

Name :

Code :

Number :

|                      |   |                      |                      |                      |                      |   |                      |                      |                      |   |   |   |   |                      |                      |
|----------------------|---|----------------------|----------------------|----------------------|----------------------|---|----------------------|----------------------|----------------------|---|---|---|---|----------------------|----------------------|
| <input type="text"/> | - | <input type="text"/> | <input type="text"/> | <input type="text"/> | <input type="text"/> | - | <input type="text"/> | <input type="text"/> | <input type="text"/> | - | 0 | 0 | - | <input type="text"/> | <input type="text"/> |
|----------------------|---|----------------------|----------------------|----------------------|----------------------|---|----------------------|----------------------|----------------------|---|---|---|---|----------------------|----------------------|

### Interviewer

Number :

|                      |                      |                      |                      |
|----------------------|----------------------|----------------------|----------------------|
| <input type="text"/> | <input type="text"/> | <input type="text"/> | <input type="text"/> |
|----------------------|----------------------|----------------------|----------------------|

Date of the survey :

|   |   |   |   |   |   |   |   |   |   |
|---|---|---|---|---|---|---|---|---|---|
| D | D | - | M | M | - | 2 | 0 | 1 | 8 |
|---|---|---|---|---|---|---|---|---|---|

## How to fill in this questionnaire?

- For most questions, tick/cross the box that best matches your reply (ex.: cross the box in front of “yes” if you have once smoked)

### EX.01 Have you smoked more than just a pack of cigarettes in your entire life?

- Yes  
1
- No  
2

- Sometimes you are expected to write down numbers in open boxes (ex.: “19” in reply to the question hereunder)

### EX.02 How old were you when you started smoking?

I was   years old

- In some cases, according to your answer you will be asked a related sub-question (ex.: if you reply “yes” to EX.03, then you should also answer sub-question a) If yes, how many years... (ex.: fill in “6” if the case)

### EX.03 Have you ever smoked daily?

Yes  
1

a) If yes, how many years have you smoked daily?   year

No  
2

- In other cases, your answer to a question may lead you to “jump” a series of questions and go directly to one that is placed further in the questionnaire (ex.: if you reply “no” to EX.04, you are directed to the question SH.01 on another page)

### EX.04 Have you ever attempted to quit smoking?

Yes, several times  
1

Yes, once  
2

No  
3

⇒ Go to SH.01 page 3

- Unless specified otherwise, tick/cross only one reply-box per question, and pass on to the question that follows directly. Do not pay attention to the small figures on the left of the boxes.

## Information

In order to guarantee the correct match with the questionnaire through interview, please indicate hereunder your year of birth, gender and the postal code of your residence:

Year of birth:

You are: <sub>1</sub>  a man

<sub>2</sub>  a woman

Postal code:

## Perceived health

**SH.01** How is your health in general? Is it ...

<sub>1</sub>  Very good

<sub>2</sub>  Good

<sub>3</sub>  Fair

<sub>4</sub>  Bad

<sub>5</sub>  Very bad

**SH.02** Do you suffer from (have) any chronic (long-standing) illness or condition (health problem)?

<sub>1</sub>  Yes

<sub>2</sub>  No

**SH.03** For the past **6 months or more** have you been limited in activities people usually do because of a health problem?

<sub>1</sub>  Yes, strongly limited

<sub>2</sub>  Yes, limited

<sub>3</sub>  No, not limited

## Stress and well-being

How have you been feeling the last few weeks?

In the past few weeks...

**WB.01** Have you been able to concentrate on whatever you're doing?

- 1  Better than usual  
2  Same as usual  
3  Less than usual  
4  Much less than usual

**WB.02** Have you lost much sleep over worry?

- 1  Not at all  
2  No more than usual  
3  Rather more than usual  
4  Much more than usual

**WB.03** Have you felt that you are playing a useful part in things?

- 1  More so than usual  
2  Same as usual  
3  Less useful than usual  
4  Much less useful

**WB.04** Have you felt capable of making decisions about things?

- 1  More so than usual  
2  Same as usual  
3  Less so than usual  
4  Much less capable

In the past few weeks...

**WB.05**      **Have you felt constantly under strain?**

- 1  Not at all  
2  No more than usual  
3  Rather more than usual  
4  Much more than usual

**WB.06**      **Have you felt you couldn't overcome your difficulties?**

- 1  Not at all  
2  No more than usual  
3  Rather more than usual  
4  Much more than usual

**WB.07**      **Have you been able to enjoy your normal day-to-day activities?**

- 1  More so than usual  
2  Same as usual  
3  Less so than usual  
4  Much less than usual

**WB.08**      **Have you been able to face up to your problems?**

- 1  More so than usual  
2  Same as usual  
3  Less able than usual  
4  Much less able

In the past few weeks...

**WB.09 Have you been feeling unhappy or depressed?**

- 1  Not at all
- 2  No more than usual
- 3  Rather more than usual
- 4  Much more than usual

**WB.10 Have you been loosing confidence in yourself?**

- 1  Not at all
- 2  No more than usual
- 3  Rather more than usual
- 4  Much more than usual

**WB.11 Have you been thinking of yourself as a worthless person?**

- 1  Not at all
- 2  No more than usual
- 3  Rather more than usual
- 4  Much more than usual

**WB.12 Have you been feeling reasonably happy, all things considered?**

- 1  More so than usual
- 2  About same as usual
- 3  Less so than usual
- 4  Much less than usual

**WB.13 Have you felt optimistic about your future?**

- 1  More so than usual
- 2  About same as usual
- 3  Less so than usual
- 4  Much less than usual

**VT.01** On a scale from 0 to 10, where 0 means “not at all satisfied” and 10 means “completely satisfied”, how satisfied do you currently feel with your life as a whole?

|                          |   |                          |   |                          |   |                          |   |                          |   |                          |                      |                          |   |                          |   |                          |   |                          |   |                          |   |                          |
|--------------------------|---|--------------------------|---|--------------------------|---|--------------------------|---|--------------------------|---|--------------------------|----------------------|--------------------------|---|--------------------------|---|--------------------------|---|--------------------------|---|--------------------------|---|--------------------------|
| <input type="checkbox"/> | — | <input type="checkbox"/> | — | <input type="checkbox"/> | — | <input type="checkbox"/> | — | <input type="checkbox"/> | — | <input type="checkbox"/> | —                    | <input type="checkbox"/> | — | <input type="checkbox"/> | — | <input type="checkbox"/> | — | <input type="checkbox"/> | — | <input type="checkbox"/> | — | <input type="checkbox"/> |
| 0                        |   | 1                        |   | 2                        |   | 3                        |   | 4                        |   | 5                        |                      | 6                        |   | 7                        |   | 8                        |   | 9                        |   | 10                       |   |                          |
| not at all satisfied     |   |                          |   |                          |   |                          |   |                          |   |                          | completely satisfied |                          |   |                          |   |                          |   |                          |   |                          |   |                          |

**VT.02** How much during the past weeks...

| <i>(Tick one box per line)</i>    | All of the time            | Most of the time           | Some of the time           | A little of the time       | None of the time           |
|-----------------------------------|----------------------------|----------------------------|----------------------------|----------------------------|----------------------------|
| 01. did you feel full of life?    | 1 <input type="checkbox"/> | 2 <input type="checkbox"/> | 3 <input type="checkbox"/> | 4 <input type="checkbox"/> | 5 <input type="checkbox"/> |
| 02. did you have a lot of energy? | 1 <input type="checkbox"/> | 2 <input type="checkbox"/> | 3 <input type="checkbox"/> | 4 <input type="checkbox"/> | 5 <input type="checkbox"/> |
| 03. did you feel worn out?        | 1 <input type="checkbox"/> | 2 <input type="checkbox"/> | 3 <input type="checkbox"/> | 4 <input type="checkbox"/> | 5 <input type="checkbox"/> |
| 04. did you feel tired?           | 1 <input type="checkbox"/> | 2 <input type="checkbox"/> | 3 <input type="checkbox"/> | 4 <input type="checkbox"/> | 5 <input type="checkbox"/> |

## Eating behaviours

| <i>(Tick one box per line)</i>                                                         | Yes                        | No                         |
|----------------------------------------------------------------------------------------|----------------------------|----------------------------|
| <b>EB.01</b> Have you recently lost more than 6 kilos in a 3-month period?             | 1 <input type="checkbox"/> | 2 <input type="checkbox"/> |
| <b>EB.02</b> Do you worry that you have lost control over how much you eat?            | 1 <input type="checkbox"/> | 2 <input type="checkbox"/> |
| <b>EB.03</b> Do you make yourself sick because you feel uncomfortably full?            | 1 <input type="checkbox"/> | 2 <input type="checkbox"/> |
| <b>EB.04</b> Do others say you are too thin, while you believe yourself to be too fat? | 1 <input type="checkbox"/> | 2 <input type="checkbox"/> |
| <b>EB.05</b> Would you say that food dominates your life?                              | 1 <input type="checkbox"/> | 2 <input type="checkbox"/> |

## Other difficulties

**AD.01** Over the last two weeks, have you been bothered by the following problems?

| <i>(Tick one box per line)</i>                                                                                                                                               | Not at all                    | Several days                  | More than half the days       | Nearly every day              |
|------------------------------------------------------------------------------------------------------------------------------------------------------------------------------|-------------------------------|-------------------------------|-------------------------------|-------------------------------|
| 01. Feeling nervous, anxious or on edge                                                                                                                                      | <input type="checkbox"/><br>1 | <input type="checkbox"/><br>2 | <input type="checkbox"/><br>3 | <input type="checkbox"/><br>4 |
| 02. Not being able to stop or control worrying                                                                                                                               | <input type="checkbox"/><br>1 | <input type="checkbox"/><br>2 | <input type="checkbox"/><br>3 | <input type="checkbox"/><br>4 |
| 03. Worrying too much about different things                                                                                                                                 | <input type="checkbox"/><br>1 | <input type="checkbox"/><br>2 | <input type="checkbox"/><br>3 | <input type="checkbox"/><br>4 |
| 04. Trouble relaxing                                                                                                                                                         | <input type="checkbox"/><br>1 | <input type="checkbox"/><br>2 | <input type="checkbox"/><br>3 | <input type="checkbox"/><br>4 |
| 05. Being so restless that it is hard to sit still                                                                                                                           | <input type="checkbox"/><br>1 | <input type="checkbox"/><br>2 | <input type="checkbox"/><br>3 | <input type="checkbox"/><br>4 |
| 06. Becoming easily annoyed or irritable                                                                                                                                     | <input type="checkbox"/><br>1 | <input type="checkbox"/><br>2 | <input type="checkbox"/><br>3 | <input type="checkbox"/><br>4 |
| 07. Feeling afraid as if something awful might happen                                                                                                                        | <input type="checkbox"/><br>1 | <input type="checkbox"/><br>2 | <input type="checkbox"/><br>3 | <input type="checkbox"/><br>4 |
| 08. Little interest or pleasure in doing things                                                                                                                              | <input type="checkbox"/><br>1 | <input type="checkbox"/><br>2 | <input type="checkbox"/><br>3 | <input type="checkbox"/><br>4 |
| 09. Feeling down, depressed, or hopeless                                                                                                                                     | <input type="checkbox"/><br>1 | <input type="checkbox"/><br>2 | <input type="checkbox"/><br>3 | <input type="checkbox"/><br>4 |
| 10. Trouble falling or staying asleep, or sleeping too much                                                                                                                  | <input type="checkbox"/><br>1 | <input type="checkbox"/><br>2 | <input type="checkbox"/><br>3 | <input type="checkbox"/><br>4 |
| 11. Feeling tired or having little energy                                                                                                                                    | <input type="checkbox"/><br>1 | <input type="checkbox"/><br>2 | <input type="checkbox"/><br>3 | <input type="checkbox"/><br>4 |
| 12. Poor appetite or overeating                                                                                                                                              | <input type="checkbox"/><br>1 | <input type="checkbox"/><br>2 | <input type="checkbox"/><br>3 | <input type="checkbox"/><br>4 |
| 13. Feeling bad about yourself — or that you are a failure or have let yourself or your family down                                                                          | <input type="checkbox"/><br>1 | <input type="checkbox"/><br>2 | <input type="checkbox"/><br>3 | <input type="checkbox"/><br>4 |
| 14. Trouble concentrating on things, such as reading the newspaper or watching television                                                                                    | <input type="checkbox"/><br>1 | <input type="checkbox"/><br>2 | <input type="checkbox"/><br>3 | <input type="checkbox"/><br>4 |
| 15. Moving or speaking so slowly that other people could have noticed? Or the opposite — being so fidgety or restless that you have been moving around a lot more than usual | <input type="checkbox"/><br>1 | <input type="checkbox"/><br>2 | <input type="checkbox"/><br>3 | <input type="checkbox"/><br>4 |
| 16. Thoughts that you would be better off dead or of hurting yourself in some way                                                                                            | <input type="checkbox"/><br>1 | <input type="checkbox"/><br>2 | <input type="checkbox"/><br>3 | <input type="checkbox"/><br>4 |



**SU.01 Have you ever seriously thought of ending your life?**

1 Yes, several times

2 Yes, once

a) If yes, did you have such thoughts in the past 12 months?  1 Yes

2 No

3 No, never

**SU.02 Have you ever attempted to commit suicide?**

1 Yes, several times

2 Yes, once

a) If yes, did you attempt suicide in the past 12 months?  1 Yes

2 No

3 No, never

## Social contacts

**SO.01 How would you judge your social contacts?**

1 Really satisfying

2 Rather satisfying

3 Rather unsatisfying

4 Really unsatisfying

**SO.02 In general, how many times do you have contact with relatives, children, friends, ...?**

1 At least once a week

2 At least once a month

3 At least 3 or 4 times a year

4 At least once a year

5 Never

**SO.03**      **How many people are so close to you that you can count on them if you have serious personal problems?**

- 1  None
- 2  1 or 2
- 3  3 to 5
- 4  6 or more

**SO.04**      **How much concern do people show in what you are doing?**

- 1  A lot of concern and interest
- 2  Some concern and interest
- 3  Uncertain
- 4  Little concern and interest
- 5  No concern and interest

**SO.05**      **How easy is it to get practical help from neighbours if you should need it?**

- 1  Very easy
- 2  Easy
- 3  Possible
- 4  Difficult
- 5  Very difficult

## Leisure time physical activities

**PA.10**      **What describes best your leisure time activities during the last year?**

*(Only one answer possible)*

- 1  Hard training and competitive sport more than once a week
- 2  Jogging and other recreational sports or gardening, 4 hours or more per week
- 3  Jogging and other recreational sports or gardening, less than 4 hours per week
- 4  Walking, bicycling or other light activities 4 hours or more a week
- 5  Walking, bicycling or other light activities less than 4 hours a week
- 6  Reading, watching TV or other sedentary activities

## Alcohol consumption

**AL.01** **In the past 12 months, how often have you had an alcoholic drink of any kind (beer, wine, cider, breezers, cocktails, premixes, liquor, spirits, homemade alcohol...)?**

- |   |                          |                                                         |   |                                       |
|---|--------------------------|---------------------------------------------------------|---|---------------------------------------|
| 1 | <input type="checkbox"/> | Every day or almost                                     | } | <a href="#">⇒ Go to AL02</a>          |
| 2 | <input type="checkbox"/> | 5 - 6 days a week                                       |   |                                       |
| 3 | <input type="checkbox"/> | 3 - 4 days a week                                       |   |                                       |
| 4 | <input type="checkbox"/> | 1 - 2 days a week                                       |   |                                       |
| 5 | <input type="checkbox"/> | 2 - 3 days in a month                                   | } | <a href="#">⇒ Go to AL06 page 12</a>  |
| 6 | <input type="checkbox"/> | Once a month                                            |   |                                       |
| 7 | <input type="checkbox"/> | Less than once a month                                  |   |                                       |
| 8 | <input type="checkbox"/> | Not in the past 12 months, as I no longer drink alcohol |   | <a href="#">⇒ Go to AL08 page 13</a>  |
| 9 | <input type="checkbox"/> | Never, or only a few sips or trials in my whole life    |   | <a href="#">⇒ Go to TA.01 page 14</a> |

**AL.02** **From Monday to Thursday, on how many of these 4 days do you usually drink alcohol?**

- |   |                          |                       |                                      |
|---|--------------------------|-----------------------|--------------------------------------|
| 1 | <input type="checkbox"/> | On all 4 days         |                                      |
| 2 | <input type="checkbox"/> | On 3 of the 4 days    |                                      |
| 3 | <input type="checkbox"/> | On 2 of the 4 days    |                                      |
| 4 | <input type="checkbox"/> | On 1 of the 4 days    |                                      |
| 5 | <input type="checkbox"/> | On none of the 4 days | <a href="#">⇒ Go to AL04 page 12</a> |

**AL.03** **From Monday to Thursday, how many drinks do you have on average on such a day when you drink alcohol?**

- |   |                          |                           |
|---|--------------------------|---------------------------|
| 1 | <input type="checkbox"/> | 16 or more drinks a day   |
| 2 | <input type="checkbox"/> | 10 - 15 drinks a day      |
| 3 | <input type="checkbox"/> | 6 - 9 drinks a day        |
| 4 | <input type="checkbox"/> | 4 - 5 drinks a day        |
| 5 | <input type="checkbox"/> | 3 drinks a day            |
| 6 | <input type="checkbox"/> | 2 drinks a day            |
| 7 | <input type="checkbox"/> | 1 drink a day             |
| 8 | <input type="checkbox"/> | I don't drink on weekdays |

**AL.04** **From Friday to Sunday, on how many of these 3 days do you usually drink alcohol?**

- 1  On all 3 days
  - 2  On 2 of the 3 days
  - 3  On 1 of the 3 days
  - 4  On none of the 3 days
- ⇒ Go to AL06

**AL.05** **From Friday to Sunday, how many drinks do you have on average on such a day when you drink alcohol?**

- 1  16 or more drinks a day
- 2  10 - 15 drinks a day
- 3  6 - 9 drinks a day
- 4  4 - 5 drinks a day
- 5  3 drinks a day
- 6  2 drinks a day
- 7  1 drink a day
- 8  I don't drink on weekends

**AL.06** **In the past 12 months, how often have you had 6 or more drinks containing alcohol on one occasion?**

**For instance, during a party, a meal, an evening out with friends, alone at home,...**

- 1  Every day or almost
  - 2  5 - 6 days a week
  - 3  3 - 4 days a week
  - 4  1 - 2 days a week
  - 5  2 - 3 days in a month
  - 6  Once a month
  - 7  Less than once a month
  - 8  Not in the past 12 months
  - 9  Never in my whole life
- } ⇒ Go to AL.08

**AL.07** How frequently have you had at least 4 drinks (*for women*) or at least 6 drinks (*for men*) in 2 hours?

- 1  Every day or almost
- 2  Every week, but not daily
- 3  Every month, but not weekly
- 4  Less than once a month
- 5  Not in the past 12 months
- 6  Never in my whole life

**AL.08** Not counting small sips, how old were you when you started drinking alcoholic beverages?

I was    years old

**AL.09** Have you ever felt the need to cut down on your drinking?

- 1  Yes
- a) If yes, was it 1  in the past 12 months?
- 2  more than 12 months ago?
- 2  No

**AL.10** Have you ever been criticized concerning your drinking?

- 1  Yes
- a) If yes, was it 1  in the past 12 months?
- 2  more than 12 months ago?
- 2  No

**AL.11** Have you ever felt guilty about your drinking?

- 1  Yes
- a) If yes, was it 1  in the past 12 months?
- 2  more than 12 months ago?
- 2  No

**AL.12** Have you ever felt the need to take a drink first thing in the morning (eye opener)?

Yes

1

a) If yes, was it  in the past 12 months?  
 more than 12 months ago?

No

2

**AL.13** Have you ever been unable to remember what you did or said because you had been drinking?

Yes

1

a) If yes, was it  in the past 12 months?  
 more than 12 months ago?

No

2

## Tobacco consumption

Do not refer to the electronic cigarette.

**TA.01** Have you ever smoked even just one whole cigarette in your life?

Yes

1

a) If yes, how old were you when you smoked your first whole cigarette?

years old

No

2

⇒ Go to TP01 page 19

**TA.02** Have you smoked at least 100 cigarettes in total (about 5 packets) or the equivalent amount of tobacco in your whole life?

Yes

1

No

2

⇒ Go to TP01 page 19

**TA.03** Have you ever, in your lifetime, smoked on a daily basis?

Yes

1

No

2

⇒ Go to TA.06 page 15

**TA.04** If yes, how old were you when you started smoking daily (even if you stopped smoking daily since)?

I was   years old

**TA.05** If yes, for how many years in total have you smoked daily?

*(Add all separate periods of daily smoking up to today)*

I have smoked daily for   years in total

*(If it is less than a year, write "0")*

**TA.06** Do you smoke nowadays?

Yes, daily ⇒ Continue with TA.07

Yes, occasionally ⇒ Go to TA.12 page 18

No, not at all ⇒ Go to TA.14 page 18

## Daily smokers

These questions are only for respondents who currently smoke every day.

Occasional smokers go to question TA.12 page 17.

Ex-smokers go to question TA.14 page 18.

**TA.07** What quantity do you usually smoke per day?

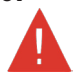

*BEWARE! Please report the number of items you smoke per day, not the number of packs, nor what you smoke occasionally!*

01. I smoke daily   cigarettes (rolled &/or manufactured)

02. I smoke daily   cigars/cigarillos

03. I smoke daily   pipefuls of tobacco

04. I smoke daily   sittings of ookah, nargileh, waterpipes

05. I smoke daily   other (specify): \_\_\_\_\_

**TA.08** When do you smoke your first cigarette (cigar, pipe,...) after waking?

- 1  Within 5 minutes after waking
- 2  Within 6 to 30 minutes after waking
- 3  Within 31 to 60 minutes after waking
- 4  More than 60 minutes after waking

**TA.09** Have you ever stopped smoking for 24 hours or more because you were trying to quit?

- 1  Yes, several times
- 2  Yes, once
- 3  No ⇒ Go to TP01 page 19

**TA.10** When was the last time you attempted to give up smoking and quit for at least 24 hours?

- 1  Less than 6 months ago
- 2  6 months ago or longer, but less than 12 months ago
- 3  12 months ago or longer

**TA.11** Think about the last time you stopped smoking for 24 hours or more because you were trying to quit. What method(s) (if any) did you use to help you quit?

*(More than 1 answer possible)*

- 1  No particular method or assistance
- 2  Online/phone service "Tabac Stop"
- 3  Individual or group counselling with a tabacologist (not my doctor)
- 4  Consultation with a health professional (not tabacologist)
- 5  Use of prescribed medicine (Zyban, Champix, ...)
- 6  Electronic cigarette (with or without nicotine)
- 7  Nicotine substitutes (patch, gums, spray, tablets,..)
- 8  Self-help materials through Internet, leaflets, books...
- 9  Acupuncture, hypnosis, aromatherapy, kinesiology...

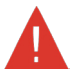

**Daily smokers: go to TP.01 page 19!**



## Occasional smokers

These questions are for respondents who do not smoke every day.

Daily smokers go to question TP.01 page 19.

Ex-smokers go to question TA.14 page 17.

**TA.12** You reported that you smoke, but not every day. How frequently do you actually smoke?

- 1  4 to 6 days per week
- 2  1 to 3 days per week
- 3  1 to several days a month, but not weekly
- 4  1 to several days a year, but not monthly
- 5  Less than 1 day per year

**TA.13** Do you currently smoke more, less or the same amount as 2 years ago?

- 1  I smoke more than 2 years ago
- 2  I smoke less than 2 years ago
- 3  I smoke as much as 2 years ago

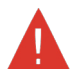

**Occasional smokers: go page TP.01 page 19!**

## Ex-smokers

These questions are for respondents who have smoked in the past, but no longer smoke currently.

### TA.14 How long is it since you have stopped smoking?

- 1  Less than 1 month ago
- 2  1 month ago or longer, but less than 6 months ago
- 3  6 months ago or longer, but less than 1 year ago
- 4  1 year ago or longer, but less than 2 years ago
- 5  2 years ago or longer, but less than 10 years ago
- 6  10 years ago or longer
- 7  Not applicable ⇒ Go to TP.01 page 19

### TA.15 What method (if any) did you use to help you quit smoking?

*(More than 1 answer possible)*

- 1  No particular method or assistance
- 2  Online/phone service "Tabac Stop"
- 3  Individual or group counselling with a tabacologist (not my doctor)
- 4  Consultation with a health professional (not tabacologist)
- 5  Use of prescribed medicine (Zyban, Champix, ...)
- 6  Electronic cigarette (with or without nicotine)
- 7  Nicotine substitutes (patch, gums, spray, tablets,..)
- 8  Self-help materials through Internet, leaflets, books...
- 9  Acupuncture, hypnosis, aromatherapy, kinesiology...

## Exposure to tobacco smoke

Questions for all respondents.

**TP.01** How often are you exposed to the tobacco smoke of others indoors (inside the house where you live (at home), in the car, at work, in public places)?

*Only smoke produced by other people should be taken into account.*

- 1  Every day, 1 hour or more a day
- 2  Every day, less than 1 hour per day
- 3  At least once a week (but not every day)
- 4  Less than once a week
- 5  Never or almost never ⇒ *Go to EC.01*

**TP.02** Where are you generally exposed to the tobacco smoke of others indoors ?

*(Multiple answer possible)*

- 1  At home
- 2  In the car
- 3  At work
- 4  In public places ( Bars, restaurants, ...)
- 5  Other, specify: \_\_\_\_\_

## Electronic cigarettes (e-cigarettes)

An electronic cigarette (e-cigarette), or similar devices like e-pipe/e-cigar/e-chicha, are little electrical devices that allow simulating the act of smoking but don't burn tobacco and produce vapor from liquids instead.

The following questions refer to all these electronic 'vaping' devices as "e-cigarettes".

**EC.01** Have you ever tried an e-cigarette, even just a few puffs?

- 1  Yes
- 2  No ⇒ *Go to TP.03 page 21*

**EC.02 Are you currently using e-cigarettes?**

- 1  Yes, every day
- 2  Yes, once a week or more, but not daily
- 3  Yes, once a month or more, but not each week
- 4  Yes, less than monthly
- 5  No, not at all ⇒ Go to TP.03 page 21

**EC.03 What type of e-cigarette do you use the most?**

- 1  A disposable e-cigarette (non-rechargeable cig-a-like)
- 2  An e-cigarette that uses replaceable pre-filled cartridges (rechargeable)
- 3  An e-cigarette with a tank that you refill with e-liquids (rechargeable)
- 4  A modular system (own combination of separate parts: batteries, atomizers, etc.) that you refill with e-liquids (rechargeable)
- 5  A device that heats, rather than burns, real tobacco sticks, so it produces vapor instead of smoke (iQOS-type HNB-cigarettes)
- 6  Don't know

**EC.04 Currently, the e-cigarettes you use the most are...:**

- 1  without nicotine
- 2  with nicotine
- 3  as many with than without nicotine

**EC.05 For how long have you been using e-cigarettes?**

- 1  Less than 1 month
- 2  1 month or longer, but less than 6 months
- 3  6 months or longer, but less than 1 year
- 4  1 year or longer, but less than 2 years
- 5  2 years or longer

**EC.06 Before you first used an e-cigarette, did you smoke tobacco?**

1  Yes

2  No

**EC.07 What are your main reasons for using an e-cigarette or a vaping device?**

1  To quit smoking

2  To cut down (not quit) smoking

3  To avoid returning to smoking

4  To use where smoking is forbidden

5  By curiosity, just wanted to try them

6  Because I enjoy it

7  Because it is less harmful than tobacco

8  Because it is cheaper than tobacco

9  Because it does not harm/bother people around me

10  Other reasons (specify): \_\_\_\_\_

## Exposure to e-cigarette vapour

Questions for all respondents.

**TP.03 How often are you exposed to the vapours of electronic cigarette of others indoors (inside the house where you live (at home), in the car, at work, in public places)?**

*Only vapours produced by other people should be taken into account.*

1  Every day, 1 hour or more a day

2  Every day, less than 1 hour per day

3  At least once a week (but not every day)

4  Less than once a week

5  Never or almost never [⇒ Go to ID.01 page 22](#)

**TP.04** Where are you generally exposed to the e-cigarette vapours of others indoors ?

*(Multiple answer possible)*

- 1  At home
- 2  In the car
- 3  At work
- 4  In public places ( Bars, restaurants, ...)
- 5  Other, specify : \_\_\_\_\_

## Consumption of cannabis

**ID.01** Have you ever taken cannabis (hashish or marijuana, also known as weed, shit, dope...)?

- 1  Yes
- 2  No [⇒ Go to ID.07 page 24](#)

**ID.02** How old were you when you took cannabis for the first time?

I was    years old

**ID.03** During the last 12 months, have you taken cannabis?

- 1  Yes
- 2  No [⇒ Go to ID.07 page 24](#)

**ID.04 During the last 12 months,**

| <i>(Tick one box per line)</i> |                                                                                                                                        | Very often                 | Quite often                | From time to time          | Rarely                     | Never                      |
|--------------------------------|----------------------------------------------------------------------------------------------------------------------------------------|----------------------------|----------------------------|----------------------------|----------------------------|----------------------------|
| 01.                            | have you taken cannabis before midday?                                                                                                 | 1 <input type="checkbox"/> | 2 <input type="checkbox"/> | 3 <input type="checkbox"/> | 4 <input type="checkbox"/> | 5 <input type="checkbox"/> |
| 02.                            | have you taken cannabis when you were alone, by yourself?                                                                              | 1 <input type="checkbox"/> | 2 <input type="checkbox"/> | 3 <input type="checkbox"/> | 4 <input type="checkbox"/> | 5 <input type="checkbox"/> |
| 03.                            | have you had memory problems when you took cannabis?                                                                                   | 1 <input type="checkbox"/> | 2 <input type="checkbox"/> | 3 <input type="checkbox"/> | 4 <input type="checkbox"/> | 5 <input type="checkbox"/> |
| 04.                            | have you run into problems because of your use of cannabis (conflict, fight, accident, bad results in school, inefficient at work,...) | 1 <input type="checkbox"/> | 2 <input type="checkbox"/> | 3 <input type="checkbox"/> | 4 <input type="checkbox"/> | 5 <input type="checkbox"/> |
| 05.                            | have friends or members of your family told you that you ought to reduce your cannabis use?                                            | 1 <input type="checkbox"/> | 2 <input type="checkbox"/> | 3 <input type="checkbox"/> | 4 <input type="checkbox"/> | 5 <input type="checkbox"/> |
| 06.                            | have you tried to reduce or stop your cannabis use without succeeding?                                                                 | 1 <input type="checkbox"/> | 2 <input type="checkbox"/> | 3 <input type="checkbox"/> | 4 <input type="checkbox"/> | 5 <input type="checkbox"/> |

**ID.05 During the last 30 days, have you taken cannabis?**

1  Yes

2  No

⇒ *Go to ID.07 page 24*

**ID.06 During the last 30 days, on how many days did you take cannabis?**

1  Every day

2  20-29 days

3  10-19 days

4  4-9 days

5  1-3 days

## Consumption of other substances

**ID.07** Which other substances have you used, even if it was just once, and when did you last take them?

| <i>(Tick one box per line)</i>                                                                                                              | In the past 30 days        | In the past 12 months      | More than 12 months ago    | Never                      |
|---------------------------------------------------------------------------------------------------------------------------------------------|----------------------------|----------------------------|----------------------------|----------------------------|
| 01. Cocaine                                                                                                                                 | 1 <input type="checkbox"/> | 2 <input type="checkbox"/> | 3 <input type="checkbox"/> | 4 <input type="checkbox"/> |
| 02. Crack                                                                                                                                   | 1 <input type="checkbox"/> | 2 <input type="checkbox"/> | 3 <input type="checkbox"/> | 4 <input type="checkbox"/> |
| 03. Ecstasy (XTC, MDMA)                                                                                                                     | 1 <input type="checkbox"/> | 2 <input type="checkbox"/> | 3 <input type="checkbox"/> | 4 <input type="checkbox"/> |
| 04. Amphetamines, speed                                                                                                                     | 1 <input type="checkbox"/> | 2 <input type="checkbox"/> | 3 <input type="checkbox"/> | 4 <input type="checkbox"/> |
| 05. Methamphetamines                                                                                                                        | 1 <input type="checkbox"/> | 2 <input type="checkbox"/> | 3 <input type="checkbox"/> | 4 <input type="checkbox"/> |
| 06. Ketamine                                                                                                                                | 1 <input type="checkbox"/> | 2 <input type="checkbox"/> | 3 <input type="checkbox"/> | 4 <input type="checkbox"/> |
| 07. GHB/GBL                                                                                                                                 | 1 <input type="checkbox"/> | 2 <input type="checkbox"/> | 3 <input type="checkbox"/> | 4 <input type="checkbox"/> |
| 08. Heroin                                                                                                                                  | 1 <input type="checkbox"/> | 2 <input type="checkbox"/> | 3 <input type="checkbox"/> | 4 <input type="checkbox"/> |
| 09. LSD or other hallucinogens (magic mushrooms, psilos, DMT, mescaline, ayahuasca...)                                                      | 1 <input type="checkbox"/> | 2 <input type="checkbox"/> | 3 <input type="checkbox"/> | 4 <input type="checkbox"/> |
| 10. Opioids not prescribed for you by a doctor (e.g. fentanyl, buprenorphine, oxycodone, codein, ...)                                       | 1 <input type="checkbox"/> | 2 <input type="checkbox"/> | 3 <input type="checkbox"/> | 4 <input type="checkbox"/> |
| 11. New psychoactive substances, known as "NPS" or "research chemicals": e.g. synthetic cannabis, spice, K2, mephedrone, 4-FA, 25I-NBOMe... | 1 <input type="checkbox"/> | 2 <input type="checkbox"/> | 3 <input type="checkbox"/> | 4 <input type="checkbox"/> |
| 12. Medical psychoactive drugs not prescribed for you by a medical doctor (ex. Valium, Rilatin, Rohypnol, Temesta ...)                      | 1 <input type="checkbox"/> | 2 <input type="checkbox"/> | 3 <input type="checkbox"/> | 4 <input type="checkbox"/> |

## Gambling and betting

**GA.01** In the past 12 months, have you spent any money on games such as lottery (lotto, keno, scratchcards,...), casino games (slot machines, roulette, dice or card games, ...), Bingo, betting on sport events or races... ?

1  Yes

2  No ⇒ Go to VI.01 page 27



**GA.02** **Not including Internet games, in the past 12 months, how often have you bet or spent money on the following activities on location: in retail shops, cafés, casinos, agencies...?**

| <i>Do NOT include Internet games here</i>                         | Every day                     | Once a week or more           | Once a month or more          | Less than once a month        | Not in the past 12 months     | Never                         |
|-------------------------------------------------------------------|-------------------------------|-------------------------------|-------------------------------|-------------------------------|-------------------------------|-------------------------------|
| 01. Lottery draw tickets: loto, keno, euromillions, rapido...     | <input type="checkbox"/><br>1 | <input type="checkbox"/><br>2 | <input type="checkbox"/><br>3 | <input type="checkbox"/><br>4 | <input type="checkbox"/><br>5 | <input type="checkbox"/><br>6 |
| 02. Instant win or scratch cards: Win-for-life, subito, presto... | <input type="checkbox"/><br>1 | <input type="checkbox"/><br>2 | <input type="checkbox"/><br>3 | <input type="checkbox"/><br>4 | <input type="checkbox"/><br>5 | <input type="checkbox"/><br>6 |
| 03. Bingo in pubs and clubs                                       | <input type="checkbox"/><br>1 | <input type="checkbox"/><br>2 | <input type="checkbox"/><br>3 | <input type="checkbox"/><br>4 | <input type="checkbox"/><br>5 | <input type="checkbox"/><br>6 |
| 04. Playing poker for money                                       | <input type="checkbox"/><br>1 | <input type="checkbox"/><br>2 | <input type="checkbox"/><br>3 | <input type="checkbox"/><br>4 | <input type="checkbox"/><br>5 | <input type="checkbox"/><br>6 |
| 05. Slot machines, jackpot                                        | <input type="checkbox"/><br>1 | <input type="checkbox"/><br>2 | <input type="checkbox"/><br>3 | <input type="checkbox"/><br>4 | <input type="checkbox"/><br>5 | <input type="checkbox"/><br>6 |
| 06. Casino games: roulette, black jack, dice...                   | <input type="checkbox"/><br>1 | <input type="checkbox"/><br>2 | <input type="checkbox"/><br>3 | <input type="checkbox"/><br>4 | <input type="checkbox"/><br>5 | <input type="checkbox"/><br>6 |
| 07. Betting on (horse-) races                                     | <input type="checkbox"/><br>1 | <input type="checkbox"/><br>2 | <input type="checkbox"/><br>3 | <input type="checkbox"/><br>4 | <input type="checkbox"/><br>5 | <input type="checkbox"/><br>6 |
| 08. Betting on sport games                                        | <input type="checkbox"/><br>1 | <input type="checkbox"/><br>2 | <input type="checkbox"/><br>3 | <input type="checkbox"/><br>4 | <input type="checkbox"/><br>5 | <input type="checkbox"/><br>6 |
| 09. Other games for money                                         | <input type="checkbox"/><br>1 | <input type="checkbox"/><br>2 | <input type="checkbox"/><br>3 | <input type="checkbox"/><br>4 | <input type="checkbox"/><br>5 | <input type="checkbox"/><br>6 |

**GA.03** **In the past 12 months, how often (if ever) have you bet or spent money on Internet games or gambling activities :**

| <i>Only Internet games/gambling</i>                              | Every day                     | Once a week or more           | Once a month or more          | Less than once a month        | Not in the past 12 months     | Never                         |
|------------------------------------------------------------------|-------------------------------|-------------------------------|-------------------------------|-------------------------------|-------------------------------|-------------------------------|
| 01. Online lottery tickets: lotto, keno, euromillions, rapido... | <input type="checkbox"/><br>1 | <input type="checkbox"/><br>2 | <input type="checkbox"/><br>3 | <input type="checkbox"/><br>4 | <input type="checkbox"/><br>5 | <input type="checkbox"/><br>6 |
| 02. Online scratch cards: Win-for-life, Astro, Cash,...          | <input type="checkbox"/><br>1 | <input type="checkbox"/><br>2 | <input type="checkbox"/><br>3 | <input type="checkbox"/><br>4 | <input type="checkbox"/><br>5 | <input type="checkbox"/><br>6 |
| 03. Online bingo                                                 | <input type="checkbox"/><br>1 | <input type="checkbox"/><br>2 | <input type="checkbox"/><br>3 | <input type="checkbox"/><br>4 | <input type="checkbox"/><br>5 | <input type="checkbox"/><br>6 |
| 04. Online poker                                                 | <input type="checkbox"/><br>1 | <input type="checkbox"/><br>2 | <input type="checkbox"/><br>3 | <input type="checkbox"/><br>4 | <input type="checkbox"/><br>5 | <input type="checkbox"/><br>6 |
| 05. Online slot machines, jackpot                                | <input type="checkbox"/><br>1 | <input type="checkbox"/><br>2 | <input type="checkbox"/><br>3 | <input type="checkbox"/><br>4 | <input type="checkbox"/><br>5 | <input type="checkbox"/><br>6 |
| 06. Online casino games: roulette, black jack, dice...           | <input type="checkbox"/><br>1 | <input type="checkbox"/><br>2 | <input type="checkbox"/><br>3 | <input type="checkbox"/><br>4 | <input type="checkbox"/><br>5 | <input type="checkbox"/><br>6 |
| 07. Online (horse-) race bets                                    | <input type="checkbox"/><br>1 | <input type="checkbox"/><br>2 | <input type="checkbox"/><br>3 | <input type="checkbox"/><br>4 | <input type="checkbox"/><br>5 | <input type="checkbox"/><br>6 |
| 08. Online bets on sport games                                   | <input type="checkbox"/><br>1 | <input type="checkbox"/><br>2 | <input type="checkbox"/><br>3 | <input type="checkbox"/><br>4 | <input type="checkbox"/><br>5 | <input type="checkbox"/><br>6 |
| 09. Other online games for money                                 | <input type="checkbox"/><br>1 | <input type="checkbox"/><br>2 | <input type="checkbox"/><br>3 | <input type="checkbox"/><br>4 | <input type="checkbox"/><br>5 | <input type="checkbox"/><br>6 |

**GA.04** In the past 12 months, how much money did you spend in average per month on bets, gambling or chance games (not counting possible gains)?

- 1  40€ per month or more → Please specify      Euros per month
- 2  Less than 40€ per month → Go to VI.01 page 27

The following questions are about problematic situations that can stem from gambling activities.

**GA.05** Thinking about your gambling activities in the past 12 months, how often....

(Tick one box per line)

|                                                                                                                                            | Almost always              | Most of the time           | Sometimes                  | Never                      |
|--------------------------------------------------------------------------------------------------------------------------------------------|----------------------------|----------------------------|----------------------------|----------------------------|
| 01. have you bet more than you could really afford to lose?                                                                                | 1 <input type="checkbox"/> | 2 <input type="checkbox"/> | 3 <input type="checkbox"/> | 4 <input type="checkbox"/> |
| 02. have you needed to gamble with larger amounts of money to get the same feeling of excitement?                                          | 1 <input type="checkbox"/> | 2 <input type="checkbox"/> | 3 <input type="checkbox"/> | 4 <input type="checkbox"/> |
| 03. did you go back another day to try to win back the money you lost when you gambled?                                                    | 1 <input type="checkbox"/> | 2 <input type="checkbox"/> | 3 <input type="checkbox"/> | 4 <input type="checkbox"/> |
| 04. have you borrowed money or sold anything to get money to gamble?                                                                       | 1 <input type="checkbox"/> | 2 <input type="checkbox"/> | 3 <input type="checkbox"/> | 4 <input type="checkbox"/> |
| 05. have you felt that you might have a problem with gambling?                                                                             | 1 <input type="checkbox"/> | 2 <input type="checkbox"/> | 3 <input type="checkbox"/> | 4 <input type="checkbox"/> |
| 06. have people criticized your betting or told you that you had a gambling problem, regardless of whether or not you thought it was true? | 1 <input type="checkbox"/> | 2 <input type="checkbox"/> | 3 <input type="checkbox"/> | 4 <input type="checkbox"/> |
| 07. has gambling caused you any health problems, including stress or anxiety?                                                              | 1 <input type="checkbox"/> | 2 <input type="checkbox"/> | 3 <input type="checkbox"/> | 4 <input type="checkbox"/> |
| 08. has your gambling caused any financial problems for you or your household?                                                             | 1 <input type="checkbox"/> | 2 <input type="checkbox"/> | 3 <input type="checkbox"/> | 4 <input type="checkbox"/> |
| 09. have you felt guilty about the way you gamble or what happens when you gamble?                                                         | 1 <input type="checkbox"/> | 2 <input type="checkbox"/> | 3 <input type="checkbox"/> | 4 <input type="checkbox"/> |

**GA.06** In the past 12 months, have you searched/received any professional help in relation to problems caused by your gambling activities?

- 1  Yes
- 2  No

## Violence

**VI.01** In the past 12 months, have you been a victim of burglary, robbery, or armed robbery, of verbal or psychological violence (eg. insults, threats, isolation), of physical violence (eg. being pushed, being beaten) or of sexual violence (eg. exhibitionism, rape)?

Yes

No ⇒ Go to HI.01 page 29

➔ **VI.02** What type of violence have you personally experienced in the past 12 months, and where did it take place?

| <i>(More than one answer possible)</i>                                                            | At home                       | At work / school              | In a public place/on the public road | Elsewhere                     |
|---------------------------------------------------------------------------------------------------|-------------------------------|-------------------------------|--------------------------------------|-------------------------------|
| 01. Burglary, robbery or armed robbery                                                            | <input type="checkbox"/><br>1 | <input type="checkbox"/><br>2 | <input type="checkbox"/><br>3        | <input type="checkbox"/><br>4 |
| <b>Verbal or psychological violence</b>                                                           |                               |                               |                                      |                               |
| 02. Insults, mockery, humiliations, sarcasm, constant criticism                                   | <input type="checkbox"/><br>1 | <input type="checkbox"/><br>2 | <input type="checkbox"/><br>3        | <input type="checkbox"/><br>4 |
| 03. Threats, intimidation, blackmail, stalking, denigration, sexual or racist comments/harassment | <input type="checkbox"/><br>1 | <input type="checkbox"/><br>2 | <input type="checkbox"/><br>3        | <input type="checkbox"/><br>4 |
| 04. Isolation, deprivation of freedom                                                             | <input type="checkbox"/><br>1 | <input type="checkbox"/><br>2 | <input type="checkbox"/><br>3        | <input type="checkbox"/><br>4 |
| <b>Physical violence</b>                                                                          |                               |                               |                                      |                               |
| 05. Being knocked down, pushed, shaken...                                                         | <input type="checkbox"/><br>1 | <input type="checkbox"/><br>2 | <input type="checkbox"/><br>3        | <input type="checkbox"/><br>4 |
| 06. Being hit/beaten, wounded with a weapon, strangled,...                                        | <input type="checkbox"/><br>1 | <input type="checkbox"/><br>2 | <input type="checkbox"/><br>3        | <input type="checkbox"/><br>4 |
| <b>Sexual violence</b>                                                                            |                               |                               |                                      |                               |
| 07. Exhibitionism                                                                                 | <input type="checkbox"/><br>1 | <input type="checkbox"/><br>2 | <input type="checkbox"/><br>3        | <input type="checkbox"/><br>4 |
| 08. Sexual assault, forced intercourse, rape                                                      | <input type="checkbox"/><br>1 | <input type="checkbox"/><br>2 | <input type="checkbox"/><br>3        | <input type="checkbox"/><br>4 |
| <b>Other</b>                                                                                      |                               |                               |                                      |                               |
| 09. Specify: _____                                                                                | <input type="checkbox"/><br>1 | <input type="checkbox"/><br>2 | <input type="checkbox"/><br>3        | <input type="checkbox"/><br>4 |

If you were victim of one or more above-mentioned acts of violence in the past 12 months, please refer to the worst incident when answering the next questions.

**VI.03 As a result of this act of violence, did you consult or contact with one or more of the following persons, services or institutions?**

*(More than one response possible)*

- 1  Family (father, mother, brother, sister,...)
- 2  Friends
- 3  Trustee at work or in school, Confidential Doctors Bureau (CDB)
- 4  Police
- 5  Medical service (practitioner, hospital,...)
- 6  Psychologist
- 7  Law- or juridicial service agency, lawyer, courthouse
- 8  Victim assistance or support services, youth help services, shelter/safe house
- 9  Call-centers for assistance (télé-accueil, SOS children, SOS sexual abuse, Center for battered women)
- 10  Other, specify: \_\_\_\_\_
- 11  I didn't consulted or contacted anyone

**VI.04 It happens sometimes that people know the offender(s) or the perpetrator(s) of the violent incidents. Was/were the offender(s) or perpetrator(s) of these incidents:**

- 1  Unknown person
- 2  Colleague(s)
- 3  Acquaintance(s)
- 4  Friend(s)
- 5  My partner
- 6  My ex-partner
- 7  My parent(s)
- 8  My (step)child(ren)
- 9  Another member of the family
- 10  Other, specify: \_\_\_\_\_
- 11  Don't know
- 12  I prefer not to answer this question

## Knowledge and attitudes towards AIDS

### HI.01 According to you, ...

|                                                                                                                     | Yes                        | No                         | Don't know                 |
|---------------------------------------------------------------------------------------------------------------------|----------------------------|----------------------------|----------------------------|
| 01. is there a risk of HIV transmission when having sex with only one uninfected partner who has no other partners? | 1 <input type="checkbox"/> | 2 <input type="checkbox"/> | 3 <input type="checkbox"/> |
| 02. Can a person reduce the risk of getting HIV by using a condom every time they have sex?                         | 1 <input type="checkbox"/> | 2 <input type="checkbox"/> | 3 <input type="checkbox"/> |
| 03. Can a healthy-looking person have HIV?                                                                          | 1 <input type="checkbox"/> | 2 <input type="checkbox"/> | 3 <input type="checkbox"/> |
| 04. Can a person get HIV by hugging or shaking hands with a person who is infected?                                 | 1 <input type="checkbox"/> | 2 <input type="checkbox"/> | 3 <input type="checkbox"/> |
| 05. Can a person get HIV by drinking from an infected person's glass?                                               | 1 <input type="checkbox"/> | 2 <input type="checkbox"/> | 3 <input type="checkbox"/> |

### HI.02 Have you ever been tested for HIV?

- 1  Yes, less than 1 week ago
- 2  Yes, more than 1 week ago, but less than 3 months ago
- 3  Yes, more than 3 months ago, but less than 1 year ago
- 4  Yes, more than one year ago
- 5  No, never
- 6  I don't know
- } ⇒ *Go to HI.04 page 30*

### HI.03 We don't want to know the results, but have you been told the results of this test or have you received them?

- 1  Yes
- 2  No

**HI.04 Have you ever been tested for a Sexually Transmitted Disease other than HIV?**

- 1  Yes, less than 1 week ago
- 2  Yes, more than 1 week ago, but less than 3 months ago
- 3  Yes, more than 3 months ago, but less than 1 year ago
- 4  Yes, more than one year ago
- 5  No, never
- 6  I don't know

} ⇒ *Go to RH.01*

**HI.05 We don't want to know the results, but have you been told the results of this test or have you received them?**

- 1  Yes
- 2  No

## Health and Sexuality

The following questions may appear very personal to you. They concern sexual behavior which is also an important health determinant.

You can be assured that anything you answer will remain strictly anonymous and confidential.

**RH.01 Have you ever had sexual intercourse? Please include vaginal, anal and oral sex.**

- 1  Yes
- 2  No

⇒ *Go to HL.01 page 33*

**RH.02 How old were you when you first had sexual intercourse?**

I was   years

**RH.03 In the past 12 months, have you had sexual intercourse?**

- 1  Yes
- 2  No

⇒ *Go to HL.01 page 33*

**RH.04** With how many different partners, have you had sexual intercourse in the last 12 months?

- 1  1 partner
- 2  2 partners
- 3  3 partners
- 4  4 or more partners
- 5  Don't know

**RH.05** Did you use a condom the last time you had sexual intercourse?

- 1  Yes
- 2  No
- 3  Don't know

**RH.06** During the last 12 months, did you - yourself or your partner(s) - use a contraceptive method (to avoid a pregnancy)?

- 1  Yes
- 2  No
- 3  Not concerned (pregnant or trying to be, menopausal women, women who have relations with women)

⇒ Go to HL.01 page 33

**RH.07** Which contraceptive method(s) did you or your partner(s) use during the last 12 months?

*(Mutiple responses possible)*

1  A contraceptive pill

2  A patch

3  An implant

4  Injectable contraceptives (such as Depo-Provera)

5  A vaginal ring (such as NuvaRing)

6  An IUD (intra-uterine device)

7  A morning after pill

8  A diaphragm

9  A spermicide or a contraceptive sponge

10  A male condom

11  A female condom

12  Periodical abstention

13  Withdrawal

14  Sterilization of the woman

15  Sterilization of the man

16  Other method. Which one: \_\_\_\_\_



## Health Literacy

There are many situations in everyday life that are important for our health. Some are difficult while we may find others easier. Please indicate for each of the following tasks how difficult or easy they are for you.

**HL.01** On a scale from very easy to very difficult, how easy would you say it is to:

| <i>(Een kruisje per lijn)</i>                                                                                      | Very easy                  | Fairly easy                | Fairly difficult           | Very difficult             |
|--------------------------------------------------------------------------------------------------------------------|----------------------------|----------------------------|----------------------------|----------------------------|
| 01. judge when you may need to get a second opinion from another doctor?                                           | 1 <input type="checkbox"/> | 2 <input type="checkbox"/> | 3 <input type="checkbox"/> | 4 <input type="checkbox"/> |
| 02. use information the doctor gives you to make decisions about an illness?                                       | 1 <input type="checkbox"/> | 2 <input type="checkbox"/> | 3 <input type="checkbox"/> | 4 <input type="checkbox"/> |
| 03. find information on how to manage certain mental health problems like stress or depression?                    | 1 <input type="checkbox"/> | 2 <input type="checkbox"/> | 3 <input type="checkbox"/> | 4 <input type="checkbox"/> |
| 04. judge if the information on health risks in the media is reliable? (Examples: TV, Internet or other media)     | 1 <input type="checkbox"/> | 2 <input type="checkbox"/> | 3 <input type="checkbox"/> | 4 <input type="checkbox"/> |
| 05. find out about activities that are good for your mental well-being? (Examples: meditation, sport, walking,...) | 1 <input type="checkbox"/> | 2 <input type="checkbox"/> | 3 <input type="checkbox"/> | 4 <input type="checkbox"/> |
| 06. understand information in the media on how to get healthier? (Examples: Internet, newspapers, magazines)       | 1 <input type="checkbox"/> | 2 <input type="checkbox"/> | 3 <input type="checkbox"/> | 4 <input type="checkbox"/> |

## Quality of Life

© EuroQol Research Foundation. EQ-5D™ is a trade mark of the EuroQol Research Foundation.

Belgium (English) v2.0: We are not authorized to publish the questions.

**QL.01**

**QL.02**

**QL.03**

**QL.04**

**QL.05**

*Thank you for your collaboration!*

Do you have any remarks?

---

---

---

---

---

---

---

---

---

---

Télé-accueil is a (French-speaking) help line or service that offers professional help to people in crisis, in distress or in need of emotional / psychological support

This service is available for callers 24/24h all year round.

Confidentiality and anonymity are warranted.

Télé-accueil

Tel.: **107**

Web: [www.tele-accueil.be](http://www.tele-accueil.be)

**Sciensano**  
**Lifestyle and chronic diseases**  
**Juliette Wytsman street, 14**  
**1050 Brussels**

Stefaan Demarest      02/642 57 94

Lydia Gisle            02/642 57 53

Rana Charafeddine    02/642 57 39

E-mail : [his@sciensano.be](mailto:his@sciensano.be)

web: [www.healthsurvey.be](http://www.healthsurvey.be)
